# Supplementary material for: Functional and Mortality Outcomes with Medical and Surgical Therapy in Malignant Posterior Circulation Infarcts: A Systematic Review
Source: MDPI journal article supplement (doi:10.3390/jcm12093185), 2023-04-28
Supplement: s1 [file s1]

### Supplementary Table S1: Search Strategy

|                                                                                                                                                                                                                                                                                                                                                                                                                                                                                                                                                                                                                                                                                                                                                                                                                                                                                                                                                                                                                                                                                                                                                                                                                                                                                                                                                                                                                                                                                                                                                                                                                                                                                                                                                                                                                                                                                                                                                                            |                                                                                                                                                                                                                                                                                                                                                     |       |
|----------------------------------------------------------------------------------------------------------------------------------------------------------------------------------------------------------------------------------------------------------------------------------------------------------------------------------------------------------------------------------------------------------------------------------------------------------------------------------------------------------------------------------------------------------------------------------------------------------------------------------------------------------------------------------------------------------------------------------------------------------------------------------------------------------------------------------------------------------------------------------------------------------------------------------------------------------------------------------------------------------------------------------------------------------------------------------------------------------------------------------------------------------------------------------------------------------------------------------------------------------------------------------------------------------------------------------------------------------------------------------------------------------------------------------------------------------------------------------------------------------------------------------------------------------------------------------------------------------------------------------------------------------------------------------------------------------------------------------------------------------------------------------------------------------------------------------------------------------------------------------------------------------------------------------------------------------------------------|-----------------------------------------------------------------------------------------------------------------------------------------------------------------------------------------------------------------------------------------------------------------------------------------------------------------------------------------------------|-------|
| <b>PubMed</b> – 2,512 results                                                                                                                                                                                                                                                                                                                                                                                                                                                                                                                                                                                                                                                                                                                                                                                                                                                                                                                                                                                                                                                                                                                                                                                                                                                                                                                                                                                                                                                                                                                                                                                                                                                                                                                                                                                                                                                                                                                                              |                                                                                                                                                                                                                                                                                                                                                     |       |
| ("Brain Infarction"[MeSH Terms] OR "Ischemic Stroke"[MeSH Terms] OR "Brain Ischemia"[MeSH Terms] OR "Infarction"[MeSH Terms] OR "Ischemia"[MeSH Terms] OR ("ischemic stroke"[Title/Abstract] OR "ischaemic stroke"[Title/Abstract] OR "wake up stroke"[Title/Abstract] OR "cryptogenic stroke"[Title/Abstract] OR "cryptogenic embolism stroke"[Title/Abstract] OR "embolic stroke"[Title/Abstract] OR "cardioembolic stroke"[Title/Abstract] OR "cardio embolic stroke"[Title/Abstract] OR "cardio embolic stroke"[Title/Abstract] OR "thrombotic stroke"[Title/Abstract] OR "brain infarction"[Title/Abstract] OR "brain isch"[Title/Abstract] OR "cerebral isch"[Title/Abstract] OR "cerebral infarction"[Title/Abstract] OR "cerebellar infarction"[Title/Abstract] OR "infarct"[Title/Abstract] OR "isch"[Title/Abstract])) AND ("posterior cerebral artery"[MeSH Terms] OR "vertebral artery"[MeSH Terms] OR "basilar artery"[MeSH Terms] OR "blood circulation"[MeSH Terms] OR "occipital lobe"[MeSH Terms] OR "cerebellum"[MeSH Terms] OR (((("posterior cerebral"[Title/Abstract] OR "vertebral"[Title/Abstract] OR "cerebral"[Title/Abstract] OR "basilar"[Title/Abstract]) AND ("arteries"[Title/Abstract] OR "artery"[Title/Abstract])) OR "posterior"[Title/Abstract] OR "fossa"[Title/Abstract] OR ("cerebell*[Title/Abstract] OR "occipital"[Title/Abstract])))) AND ("decompression, surgical"[MeSH Terms] OR "craniotomy"[MeSH Terms] OR "neurosurgical procedure"[MeSH Terms] OR (((("craniotomy"[Title/Abstract] OR "craniectomy"[Title/Abstract] OR "hemicraniectomy"[Title/Abstract]) AND "decompress"[Title/Abstract]) OR "suboccipital craniectomy"[Title/Abstract] OR "neurosurgical procedures"[Title/Abstract] OR ((("ventriculoperitoneal"[Title/Abstract] OR "ventriculo-peritoneal"[Title/Abstract]) AND "shunt"[Title/Abstract]) OR "Ventriculostomy"[Title/Abstract] OR ("surgical"[Title/Abstract] AND "decompression"[Title/Abstract])))) |                                                                                                                                                                                                                                                                                                                                                     |       |
| <b>Embase</b> – 5207 results                                                                                                                                                                                                                                                                                                                                                                                                                                                                                                                                                                                                                                                                                                                                                                                                                                                                                                                                                                                                                                                                                                                                                                                                                                                                                                                                                                                                                                                                                                                                                                                                                                                                                                                                                                                                                                                                                                                                               |                                                                                                                                                                                                                                                                                                                                                     |       |
| (('brain ischemia'/exp OR 'brain infarction'/exp OR 'cerebral artery disease'/exp OR 'cerebrovascular accident'/exp OR 'occlusive cerebrovascular disease'/exp OR 'wallenberg syndrome'/exp OR 'ischemia'/exp OR 'infarction'/exp) OR ('ischemic stroke':ab,ti OR 'wake up stroke':ab,ti OR 'cryptogenic stroke':ab,ti OR 'cryptogenic embolism stroke':ab,ti OR 'embolic stroke':ab,ti OR 'cardioembolic stroke':ab,ti OR 'cardio embolic stroke':ab,ti OR 'thrombotic stroke':ab,ti OR 'brain infarction':ab,ti OR 'brain isch':ab,ti OR 'cerebral isch':ab,ti OR 'cerebral infarction':ab,ti OR 'cerebellar infarction':ab,ti OR infarct':ab,ti OR ischemia:ab,ti)) AND (('circulation'/exp OR 'basilar artery'/exp OR 'superior cerebellar artery'/exp OR 'posterior inferior cerebellar artery'/exp OR 'posterior cerebral artery'/exp OR 'anterior inferior cerebellar artery'/exp OR 'vertebral artery'/exp OR 'cerebellum'/exp OR 'occipital lobe'/exp OR 'brain stem'/exp) OR (('posterior cerebral':ab,ti OR vertebral:ab,ti OR cerebral:ab,ti OR basilar:ab,ti) AND (arteries:ab,ti OR artery:ab,ti) OR posterior:ab,ti OR fossa:ab,ti OR cerebell*:ab,ti OR occipital:ab,ti)) AND (('decompression surgery'/exp OR 'skull surgery'/exp OR 'ventriculostomy'/exp) OR ((craniotomy:ab,ti OR craniectomy:ab,ti OR hemicraniectomy:ab,ti) AND decompress*:ab,ti OR 'suboccipital craniectomy':ab,ti OR 'neurosurgical procedures':ab,ti OR ((ventriculoperitoneal:ab,ti OR 'ventriculo peritoneal':ab,ti) AND shunt*:ab,ti) OR ventriculostomy:ab,ti OR (surgical:ab,ti AND decompression*:ab,ti)))                                                                                                                                                                                                                                                                                                                                                                |                                                                                                                                                                                                                                                                                                                                                     |       |
| <b>Cochrane</b> – 123 results                                                                                                                                                                                                                                                                                                                                                                                                                                                                                                                                                                                                                                                                                                                                                                                                                                                                                                                                                                                                                                                                                                                                                                                                                                                                                                                                                                                                                                                                                                                                                                                                                                                                                                                                                                                                                                                                                                                                              |                                                                                                                                                                                                                                                                                                                                                     |       |
| Print:                                                                                                                                                                                                                                                                                                                                                                                                                                                                                                                                                                                                                                                                                                                                                                                                                                                                                                                                                                                                                                                                                                                                                                                                                                                                                                                                                                                                                                                                                                                                                                                                                                                                                                                                                                                                                                                                                                                                                                     |                                                                                                                                                                                                                                                                                                                                                     |       |
| ID                                                                                                                                                                                                                                                                                                                                                                                                                                                                                                                                                                                                                                                                                                                                                                                                                                                                                                                                                                                                                                                                                                                                                                                                                                                                                                                                                                                                                                                                                                                                                                                                                                                                                                                                                                                                                                                                                                                                                                         | Search                                                                                                                                                                                                                                                                                                                                              | Hits  |
| #1                                                                                                                                                                                                                                                                                                                                                                                                                                                                                                                                                                                                                                                                                                                                                                                                                                                                                                                                                                                                                                                                                                                                                                                                                                                                                                                                                                                                                                                                                                                                                                                                                                                                                                                                                                                                                                                                                                                                                                         | MeSH descriptor: [Brain Infarction] explode all trees                                                                                                                                                                                                                                                                                               | 1312  |
| #2                                                                                                                                                                                                                                                                                                                                                                                                                                                                                                                                                                                                                                                                                                                                                                                                                                                                                                                                                                                                                                                                                                                                                                                                                                                                                                                                                                                                                                                                                                                                                                                                                                                                                                                                                                                                                                                                                                                                                                         | MeSH descriptor: [Ischemic Stroke] explode all trees                                                                                                                                                                                                                                                                                                | 71    |
| #3                                                                                                                                                                                                                                                                                                                                                                                                                                                                                                                                                                                                                                                                                                                                                                                                                                                                                                                                                                                                                                                                                                                                                                                                                                                                                                                                                                                                                                                                                                                                                                                                                                                                                                                                                                                                                                                                                                                                                                         | MeSH descriptor: [Brain Ischemia] explode all trees                                                                                                                                                                                                                                                                                                 | 3688  |
| #4                                                                                                                                                                                                                                                                                                                                                                                                                                                                                                                                                                                                                                                                                                                                                                                                                                                                                                                                                                                                                                                                                                                                                                                                                                                                                                                                                                                                                                                                                                                                                                                                                                                                                                                                                                                                                                                                                                                                                                         | MeSH descriptor: [Infarction] explode all trees                                                                                                                                                                                                                                                                                                     | 12383 |
| #5                                                                                                                                                                                                                                                                                                                                                                                                                                                                                                                                                                                                                                                                                                                                                                                                                                                                                                                                                                                                                                                                                                                                                                                                                                                                                                                                                                                                                                                                                                                                                                                                                                                                                                                                                                                                                                                                                                                                                                         | MeSH descriptor: [Ischemia] explode all trees                                                                                                                                                                                                                                                                                                       | 14276 |
| #6                                                                                                                                                                                                                                                                                                                                                                                                                                                                                                                                                                                                                                                                                                                                                                                                                                                                                                                                                                                                                                                                                                                                                                                                                                                                                                                                                                                                                                                                                                                                                                                                                                                                                                                                                                                                                                                                                                                                                                         | (ischemic stroke* OR ischaemic stroke* OR wake up stroke* OR cryptogenic stroke* OR cryptogenic embolism stroke* OR embolic stroke* OR cardioembolic stroke* OR cardio embolic stroke* OR thrombotic stroke* OR brain infarction* OR brain isch* OR cerebral isch* OR cerebral infarction* OR cerebellar infarction* OR infarct* OR isch*):ti,ab,kw | 76333 |

|     |                                                                                                                                                                                                                                                  |       |
|-----|--------------------------------------------------------------------------------------------------------------------------------------------------------------------------------------------------------------------------------------------------|-------|
| #7  | #1 OR #2 OR #3 OR #4 OR #5 OR #6                                                                                                                                                                                                                 | 76423 |
| #8  | MeSH descriptor: [Posterior Cerebral Artery] explode all trees                                                                                                                                                                                   | 9     |
| #9  | MeSH descriptor: [Vertebral Artery] explode all trees                                                                                                                                                                                            | 66    |
| #10 | MeSH descriptor: [Basilar Artery] explode all trees                                                                                                                                                                                              | 30    |
| #11 | MeSH descriptor: [Blood Circulation] explode all trees                                                                                                                                                                                           | 7987  |
| #12 | MeSH descriptor: [Occipital Lobe] explode all trees                                                                                                                                                                                              | 278   |
| #13 | MeSH descriptor: [Cerebellum] explode all trees                                                                                                                                                                                                  | 211   |
| #14 | ((posterior cerebral OR vertebral OR cerebral OR basilar) AND (arteries OR artery) OR posterior OR fossa OR cerebell* OR occipital):ti,ab,kw                                                                                                     | 26729 |
| #15 | #8 OR #9 OR #10 OR #11 OR #12 OR #13 OR #14                                                                                                                                                                                                      | 33965 |
| #16 | MeSH descriptor: [Decompression, Surgical] explode all trees                                                                                                                                                                                     | 1148  |
| #17 | MeSH descriptor: [Craniotomy] explode all trees                                                                                                                                                                                                  | 447   |
| #18 | MeSH descriptor: [Neurosurgical Procedures] explode all trees                                                                                                                                                                                    | 6202  |
| #19 | (((craniotomy OR craniectomy OR hemicraniectomy) AND decompress*) OR suboccipital craniectomy OR neurosurgical procedures OR ((ventriculoperitoneal OR ventriculo peritoneal) AND shunt*) OR (Ventriculostomy OR (surgical AND decompression*))) | 2655  |
| #20 | #16 OR #17 OR #18 OR #19                                                                                                                                                                                                                         | 8543  |
| #21 | #7 AND #15 AND #20                                                                                                                                                                                                                               | 123   |

**Supplementary Table S2a: The Newcastle-Ottawa Scale for risk of bias assessment of Cohort studies.**

| No. | Author              | Selection<br>(Max ☆)                           |                                               |                              |                                                                                      | Comparability<br>(Max ☆☆)                                                                                 | Outcome<br>(Max ☆ per item) |                                                                |                                            | Overall<br>Quality |
|-----|---------------------|------------------------------------------------|-----------------------------------------------|------------------------------|--------------------------------------------------------------------------------------|-----------------------------------------------------------------------------------------------------------|-----------------------------|----------------------------------------------------------------|--------------------------------------------|--------------------|
|     |                     | Representativeness<br>of the exposed<br>cohort | Selection<br>of the non-<br>exposed<br>cohort | Ascertainment<br>of exposure | Demonstration<br>that outcome of<br>interest was not<br>present at start of<br>study | Comparability of<br>cohorts on the<br>basis of the design<br>or analysis<br>controlled for<br>confounders | Assessment<br>of outcome    | Was<br>follow-up<br>long<br>enough for<br>outcomes<br>to occur | Adequacy<br>of follow-<br>up of<br>cohorts |                    |
| 1   | Raco et al., 2003   | ☆                                              | ☆                                             | ☆                            | ☆                                                                                    |                                                                                                           | ☆                           |                                                                |                                            | Poor               |
| 2   | Mathew et al., 1995 | ☆                                              | ☆                                             | ☆                            | ☆                                                                                    |                                                                                                           | ☆                           |                                                                |                                            | Poor               |
| 3   | Hornig et al., 1994 | ☆                                              | ☆                                             | ☆                            | ☆                                                                                    |                                                                                                           | ☆                           |                                                                |                                            | Poor               |
| 4   | Jauss et al., 1992  | ☆                                              | ☆                                             | ☆                            | ☆                                                                                    | ☆                                                                                                         | ☆                           | ☆                                                              | ☆                                          | Good               |
| 5   | Mostofi, 2013       | ☆                                              | ☆                                             | ☆                            | ☆                                                                                    |                                                                                                           | ☆                           | ☆                                                              |                                            | Good               |
| 6   | Koh et al., 1999    | ☆                                              | ☆                                             | ☆                            | ☆                                                                                    |                                                                                                           | ☆                           | ☆                                                              | ☆                                          | Good               |
| 7   | Taneda et al., 1982 | ☆                                              | ☆                                             | ☆                            | ☆                                                                                    |                                                                                                           | ☆                           |                                                                |                                            | Poor               |
| 8   | Taylor et al., 2020 | ☆                                              | ☆                                             | ☆                            | ☆                                                                                    | ☆                                                                                                         | ☆                           |                                                                |                                            | Good               |



**Supplementary Table S2c: The Joanna Briggs Institute (JBI) Critical Appraisal Checklist for analytical case-control studies.**

[illegible]
